# Supplementary material
Source: publisher figshare collection journal article supplement (https://karger.figshare.com/ndownloader/files/15033845)

| Supplementary Table. Principal Component Analysis Pattern | | | |
| --- | --- | --- | --- |
| Percentage of Test Allocated to Each Rotated Component* | | | |
| Primary Cognitive Domain | Test | Component 1^ | Component 2^ |
| Memory | Delayed Recall | 88% | 21% |
| Short Delayed Recall | 86% | 25% |
| Immediate Recall Total | 75% | 35% |
| Recognition Total | 64% | 29% |
| Both Memory & Executive function | Digit symbol Coding | 41% | 71% |
| Executive function | Block Design | 26% | 64% |
| Trails A | 10% | 75% |
| Trails B | 37% | 71% |
| Eigenvalues (total variance explained by each factor) | | 2.87 | 2.29 |
| *An eigenvalue greater than 1.0 is generally accepted to represent adequate loading*[*26*](#_ENREF_26)  **Percentage = Correlation coefficient X 100*  *^Based on this loading pattern, Component 1 was felt to represent Memory and Component 2 was felt to represent Executive Function* | | | |

Supplement Figure: Figures show the predicted trajectories of memory function over time for four modeled subjects with levels equaling the mean blood pressure measure within each quartile. Adjusted for baseline age, sex, race, education level, cause of ESRD, dialysis vintage and history of CVD. The competing risk survival sub-model was adjusted for the same covariates included in the linear mixed sub-model in addition to variables previously shown to be associated with mortality including vascular access type, serum albumin, BMI and spKt/V. Slope values are presented as per 10mmHg change in blood pressure measure.


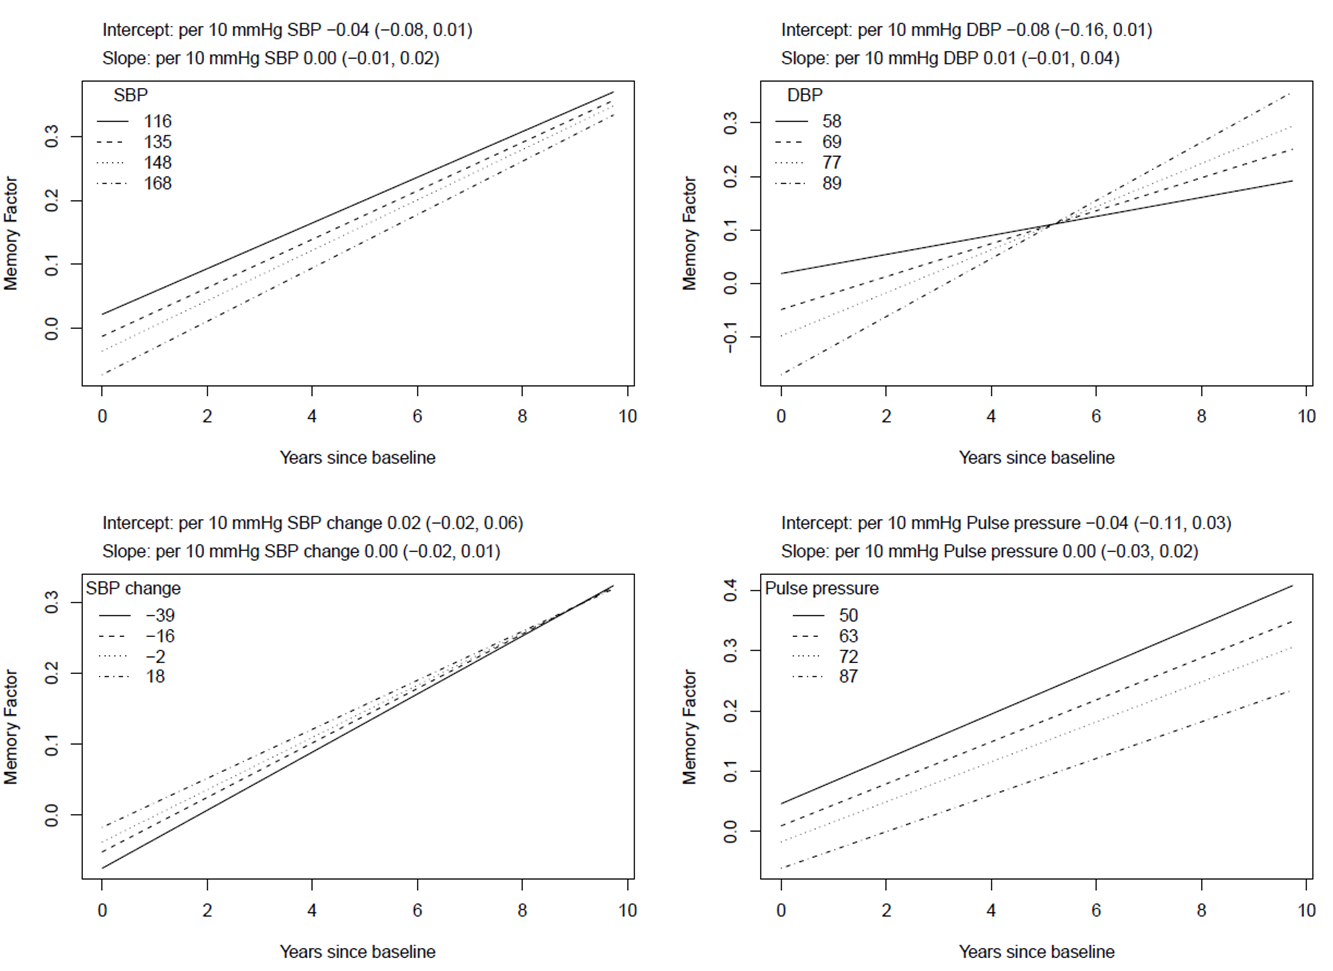

Supplement: Supplementary file 1 [file 15033845]
